# Supplementary material
Source: publisher figshare collection journal article supplement (https://gsapubs.figshare.com/ndownloader/files/28854363)
Supplement: Supplementary file 1 [file 28854363]

**References for Supplemental Material**

Amato, J.M., Heizler, M.T., Boullion, A.O., Sanders, A.E., Toro, J., McLemore, V.T., and Andronicos, C.L., 2011, Syntectonic 1.46 Ga magmatism and rapid cooling of a gneiss dome in the southern Mazatzal province: Burro Mountains, New Mexico: Geological Society of America Bulletin, v. 123., p. 1720-1744.

Amato, J. M., Athens, C., McIntosh, W., and Peters, L., 2012, U-Pb zircon ages from crustal xenoliths in a Pliocene basalt flow from the southern Rio Grande rift: Implications for the timing of magmatism and extension: in Lucas, S. G., McLemore, V. T., Lueth, V. W., Spielmann, J. A., and Krainer, K., eds., New Mexico Geological Society Guidebook, 63rd Field Conference, Warm Springs Region, p. 273-284.

Amato, J.M., Ottenfeld, C.F., and Howland, C.R., 2018, U-Pb Geochronology of Proterozoic Igneous and Metasedimentary Rocks in Southern New Mexico: Post-Collisional S-Type Granite Magmatism: in Mack, Greg H., Hampton, Brian A., Ramos, Frank C., Witcher, James C., Ulmer-Scholle, Dana S., eds., Las Cruces Country III, New Mexico Geological Society Guidebook, 69th Field Conference, p. 137-145.

Flowers, R.M., Ketcham, R.A., Shuster, D.L., and Farley, K.A., 2009, Apatite (U-Th)/He thermochronometry using a radiation damage accumulation and annealing model: Geochimica et Cosmochimica Acta, v. 73, p. 2347-2365.

Guenthner, W.R., Reiners, P.W., Ketcham, R.A., Nasdala, L., and Giester, G., 2013, Helium diffusion in natural zircon: radiation damage, anisotropy, and the interpretation of zircon (U-TH)/He thermochronology: American Journal of Science, v. 313, p. 145-198.

Ketcham, R.A., Carter, A.C., Donelick, R.A., Barbarand, J., and Hurford, A.J., 2007, Improved measurement of fission-track annealing in apatite using c-axis projection: The American Mineralogist, v. 92, p. 789–798, doi: 10.2138 /am.2007.2280.

Ketcham, R.A., Donelick, R.A., Balestrieri, M.L., and Zattin, M., 2009, Reproducibility of apatite fission-track length data and thermal history reconstruction, Earth and Planetary Science Letters, v. 284, p. 504-515.

McLemore, V.T., McIntosh, W.C., and Pease, T.C., 1995, 40Ar/39Ar age determinations of four plutons associated with mineral deposits in southwestern New Mexico: New Mexico Bureau of Mines and Mineral Resources Open-file Report 410, 36 p.

Shannon, W.M., Barens, C.G., Bickford, M., 1997. Grenville magmatism in West Texas: petrology and geochemistry of the Red Bluff granitic suite. Journal of Petrology, v. 38, p. 1279-1305.
